# Supplementary material for: A TRIM71 binding long noncoding RNA Trincr1 represses FGF/ERK signaling in embryonic stem cells
Source: PubMed Central journal article supplement (PMC6433952; doi:10.1038/s41467-019-08911-w), 2019-03-25
Supplement: 41467_2019_8911_MOESM1_ESM.pdf [file 41467_2019_8911_MOESM1_ESM.pdf]

# Supplementary Information

## **A TRIM71 binding long noncoding RNA Trincr1 represses FGF/ERK signaling in embryonic stem cells**

**Authors:** Ya-Pu Li<sup>1#</sup>, Fei-Fei Duan<sup>1#</sup>, Yu-Ting Zhao<sup>1</sup>, Kai-Li Gu<sup>1</sup>, Le-Qi Liao<sup>1</sup>, Huai-Bin Su<sup>1</sup>, Jing Hao<sup>1</sup>, Kun Zhang<sup>2</sup>, Na Yang<sup>2</sup>, Yangming Wang<sup>1\*</sup>

### **Affiliations:**

1 Beijing Key Laboratory of Cardiometabolic Molecular Medicine, Institute of Molecular Medicine, Peking University, Beijing 100871, China

2 State Key Laboratory of Medicinal Chemical Biology, College of Pharmacy, Nankai University, Tianjin 300353, China

#These authors contributed equally

\*Correspondence to: yangming.wang@pku.edu.cn (YW)

Supplementary Figure 1

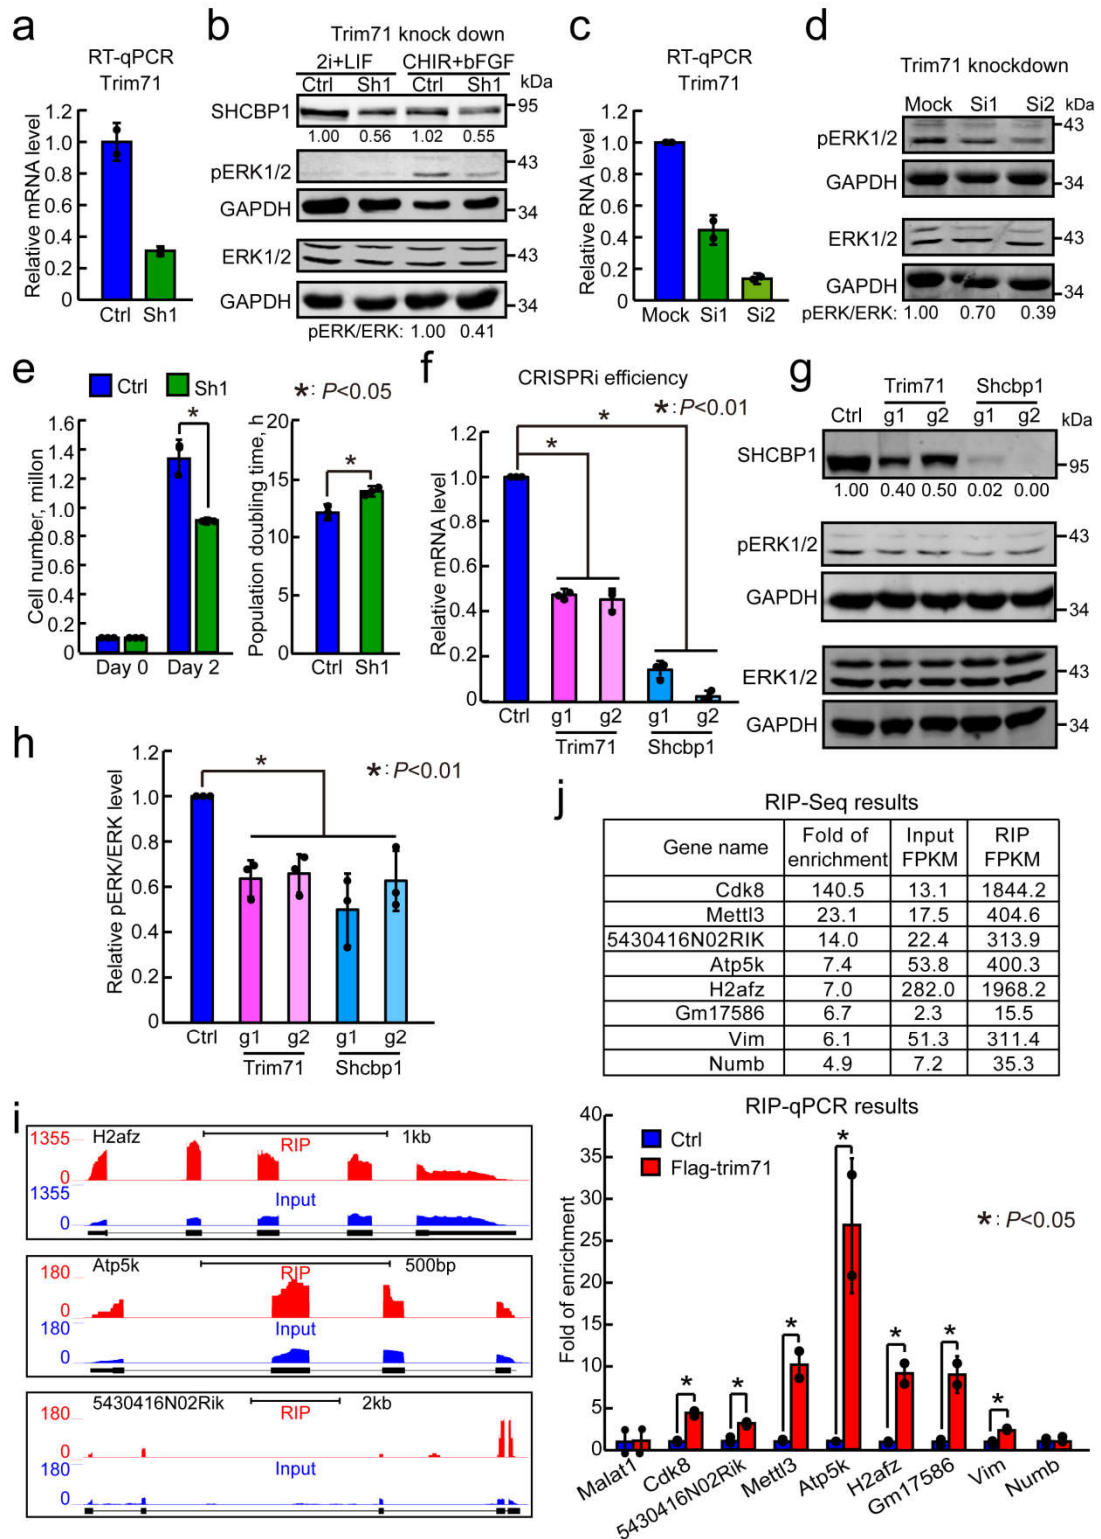

**Supplementary Figure 1.** Trim71 promotes FGF/ERK signaling in ESCs. **(a)** RT-qPCR analysis showing the downregulation of Trim71 by a shRNA. The  $\beta$ -actin gene was used as a control. Data were normalized to the mRNA level of ESCs transfected with control shRNA vectors. n = 2 biological replicates. **(b)** Western blotting analysis of SHCBP1 and phosphorylated ERK (pERK) in Trim71 shRNA ESCs cultured in 2i+LIF or CHIR induced by bFGF. Data are representative of two independent experiments. For quantification of SHCBP1 protein, data were normalized to GAPDH and then to control shRNA vector treated ESCs cultured in 2i+LIF; For quantification of pERK/ERK, data were normalized to GAPDH and then to control shRNA vector treated ESCs cultured in CHIR and induced by 12 ng per ml bFGF. For the analysis of pERK and ERK protein levels throughout this study, two separate gels instead of a single gel were used to avoid unwanted signals due to incomplete stripping. **(c)** RT-qPCR analysis showing the downregulation of Trim71 by two sets of siRNAs. The  $\beta$ -actin gene was used as a control. Data were normalized to the mRNA level of mock transfected ESCs. n = 2 biological replicates. **(d)** Western blotting analysis of phosphorylated ERK induced by bFGF in ESCs treated with two different sets of Trim71 siRNAs. For quantification of pERK/ERK, data were normalized to GAPDH and then to mock transfected wild type ESCs. **(e)** Growth (left) and population doubling time (right) for control and Trim71 shRNA knockdown ESCs in 2i+LIF medium. For the cell growth experiment, 0.2 million cells were plated in a well of 12-well plate and grown for two days before counting. Representative data of three independent experiments are shown. Cell population doubling time was obtained using equation

$N_{\text{end}} = N_{\text{start}} \times 2^{(t/T)}$ . T is the cell population doubling time,  $N_{\text{start}}$  is the starting number of ESCs plated,  $N_{\text{end}}$  is the ending number of ESCs after growing for a period of time (t). n = 3 biological replicates. **(f)** RT-qPCR analysis of knockdown efficiency of CRISPRi constructs targeting Trim71 and Shcbp1. The  $\beta$ -actin gene was used as a control. Data were normalized to control gRNA treated ESCs. n = 3 biological replicates. **(g)** Western blotting analysis of SHCBP1 and phosphorylated ERK induced by bFGF in ESCs treated with control, Trim71 and Shcbp1 CRISPRi gRNAs. **(h)** Quantification of pERK/ERK in **(g)**. For quantification of pERK/ERK, data were normalized to GAPDH and then to control gRNA treated ESCs cultured in CHIR and induced by 12 ng per ml bFGF. n = 3 independent experiments. **(i)** RIP-Seq tracks at H2afz, Atp5 and 5430416N02RIK loci. Shown are normalized read counts per million. FLAG-TRIM71-RIP and input were scaled to the same level. **(j)** RIP-seq data and RT-qPCR analysis of 8 randomly selected candidates. Top panel: fold enrichment of candidates in RIP-seq; bottom panel: RT-qPCR analysis of candidates. Data were normalized to ESCs transfected with control empty overexpression vectors. n = 2 biological replicates. Shown are mean  $\pm$  SD for all panels. For **(e)** and **(j)**, *P* values were determined by unpaired two-sided Student's *t*-test. For **(f)** and **(h)**, *P* values were determined by unpaired one-way ANOVA with two-sided Dunnett's test.

## Supplementary Figure 2

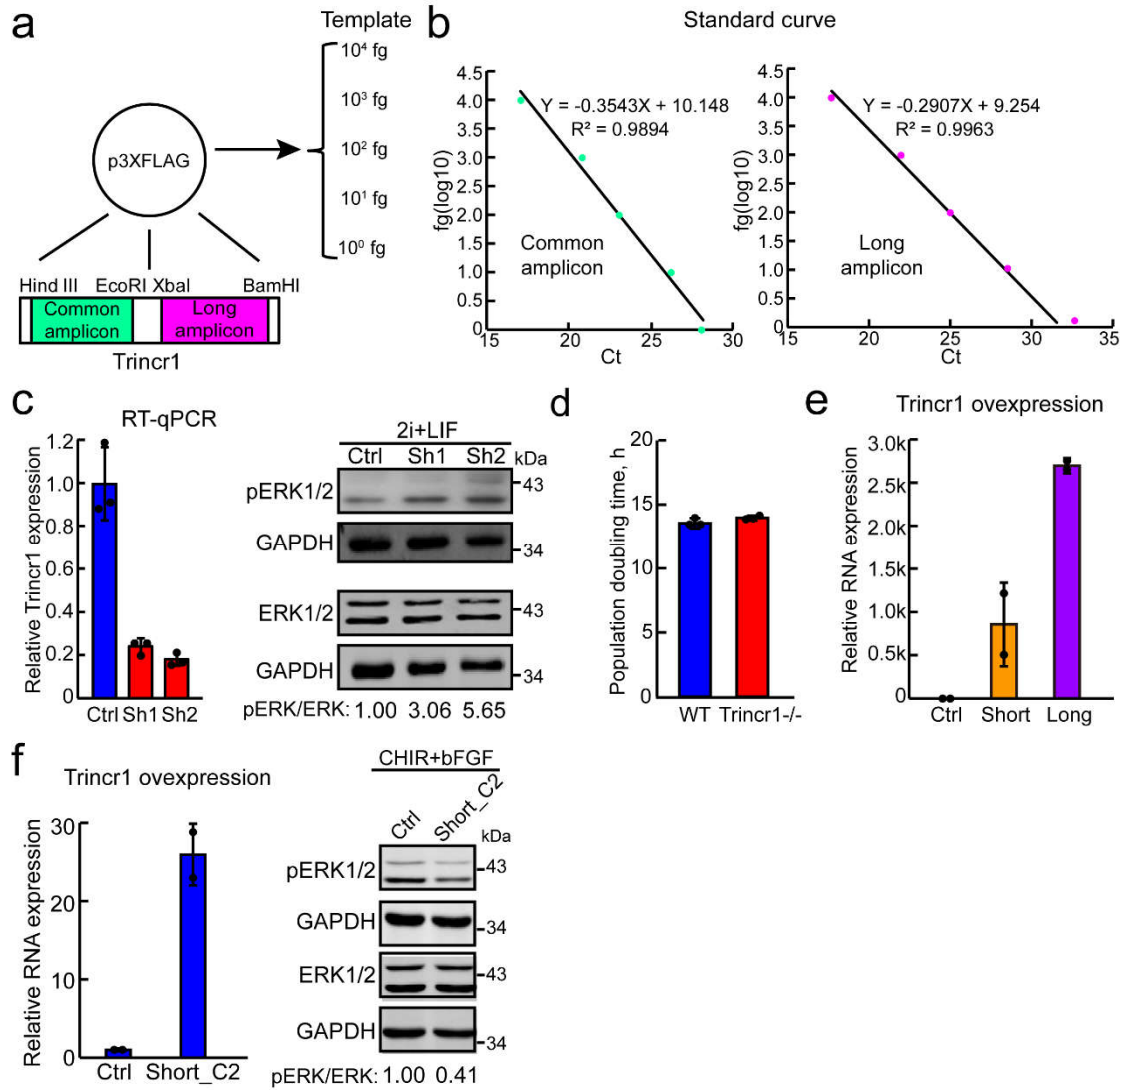

**Supplementary Figure 2.** Characterization of *Trincr1*. **(a)** Schematic design for quantifying relative level of *Trincr1\_L* and S. Both the common (L plus S) and long isoform (*Trincr1\_L*) amplicons were cloned in tandem into the same plasmid. Five different dilutions were made for qPCR to make the standard curve. The amount of *Trincr1\_L* and total *Trincr1* was calculated by fitting the Ct value into the respective standard curve. The amount of *Trincr1\_S* was calculated by subtracting the value of *Trincr1\_L* from the value of total *Trincr1*. Shown are representative standard curves **(b)** for the common and long isoform amplicons. **(c)** Western blotting analysis of basal pERK level in *Trincr1* shRNA ESCs. Left: RT-qPCR showing knock down of *Trincr1* by two sets of shRNAs. The  $\beta$ -actin gene was used as a control. Data were normalized to control empty shRNA vector treated ESCs. n = 3 biological replicates. Right: Western blotting of pERK and ERK. For pERK/ERK, data were normalized to GAPDH and then to control empty shRNA vector treated ESCs cultured in 2i+LIF. **(d)** Population doubling time for wild-type and *Trincr1*<sup>-/-</sup> ESCs in 2i+LIF medium. n = 3 biological replicates. **(e)** RT-qPCR analysis showing the level of *Trincr1* in *Trincr1* overexpression ESCs. n = 2 biological replicates. **(f)** Western blotting analysis of bFGF induced phosphorylated ERK in ESCs with low level overexpression of *Trincr1* short isoform. Left: RT-qPCR showing overexpression of *Trincr1*. n = 2 biological replicates. Right: Western blotting of pERK and ERK. For pERK/ERK, data were normalized to GAPDH and then to control empty overexpression vector treated ESCs cultured in CHIR and induced by 12 ng per ml bFGF. For RT-qPCR in (e) and (f), the  $\beta$ -actin gene

was used as a control. Data were normalized to control empty overexpression vector treated ESCs. Shown are mean  $\pm$  SD for all panels.

Supplementary Figure 3

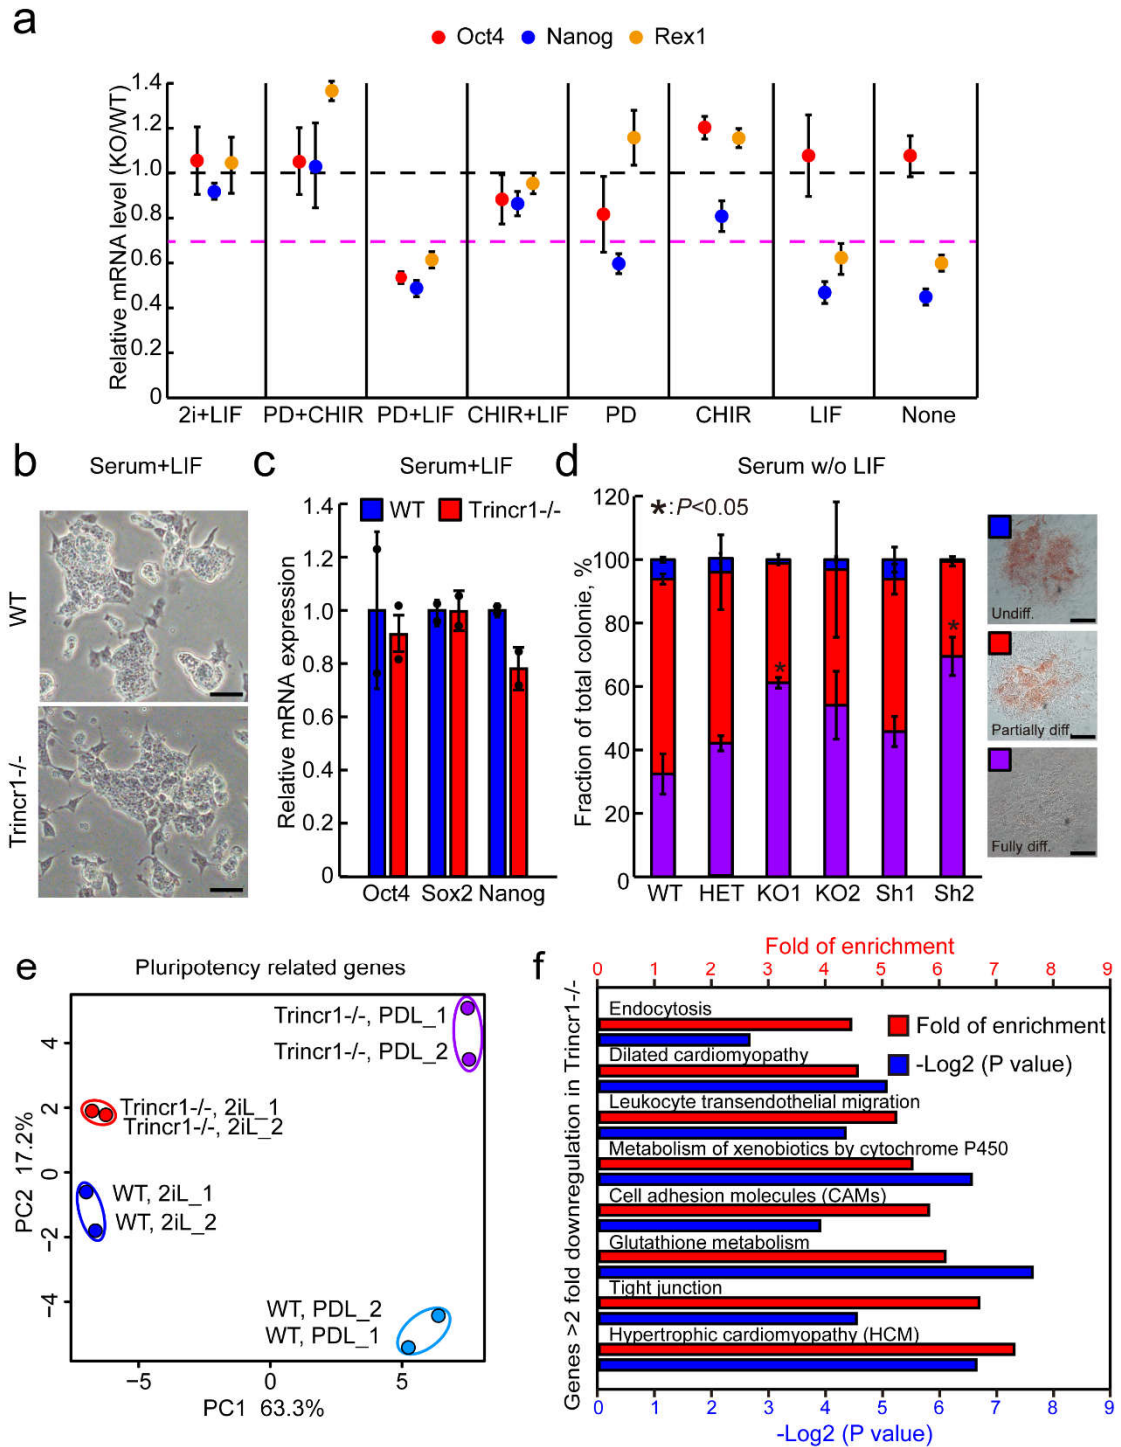



**Supplementary Figure 3.** *Trincr1* promotes the self-renewal and the expression of pluripotency genes. **(a)** RT-qPCR analysis of key pluripotency genes in *Trincr1*<sup>-/-</sup> ESCs in different media contexts. The  $\beta$ -actin gene was used as a control. For each gene, data were normalized to the mRNA level of wild type ESCs cultured in the same medium. n = 2 biological replicates. **(b)** Morphology of *Trincr1*<sup>-/-</sup> ESCs in conventional serum+LIF culture. Scale bars, 50  $\mu$ m. **(c)** RT-qPCR analysis of Oct4, Sox2 and Nanog in *Trincr1*<sup>-/-</sup> ESCs in conventional serum+LIF medium. The  $\beta$ -actin gene was used as a control. For each gene, data were normalized to the mRNA level of wild type ESCs. n = 2 biological replicates. **(d)** Fraction of un-, partially and fully differentiated colonies based on alkaline phosphatase staining for ESCs with different genotypes in serum medium without (w/o) LIF supplement. HET: *Trincr1*<sup>+/-</sup> ESC; KO1 and KO2: two independent *Trincr1*<sup>-/-</sup> ESC clones; sh1 and sh2: *Trincr1* shRNA ESC clones with two different sets of shRNAs. Representative alkaline phosphatase staining images are shown. Scale bars, 200  $\mu$ m. n = 2 biological replicates. **(e)** Principal component analysis of selected pluripotency related genes in wild-type and *Trincr1*<sup>-/-</sup> ESCs in 2i+LIF and PD+LIF. **(f)** KEGG pathway analysis of downregulated genes in *Trincr1*<sup>-/-</sup> ESCs in PD+LIF. Top 8 enriched pathways are shown with *P* values. Shown are mean  $\pm$  SD for all panels. For (d), *P* values were determined by unpaired two-way ANOVA with two-sided Dunnett's test. For (f), Gene Ontology analysis was performed by DAVID v6.8. Fisher's exact test was used to determine *P* value.

Supplementary Figure 4

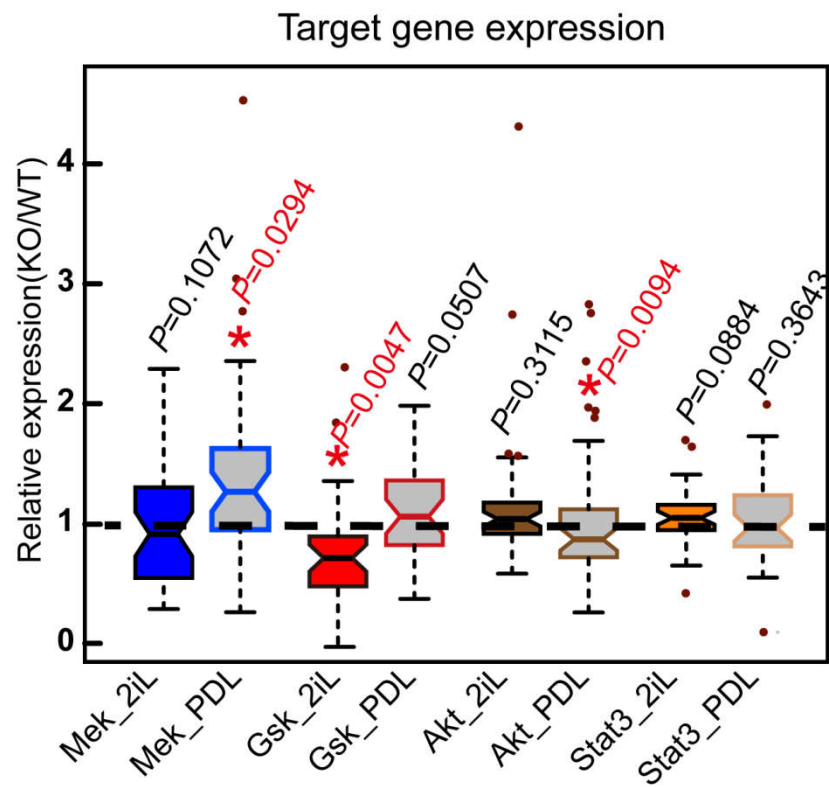

**Supplementary Figure 4.** *Trincr1* represses the expression of ERK target genes.

Pathway analysis for wild type and *Trincr1*<sup>-/-</sup> ESCs in 2i+LIF or PD+LIF medium.

Boxes indicate the 25th to 75th percentiles and the central bar represents the median. *P*

values were determined by two-tailed Wilcoxon signed-rank test.

## Supplementary Figure 5

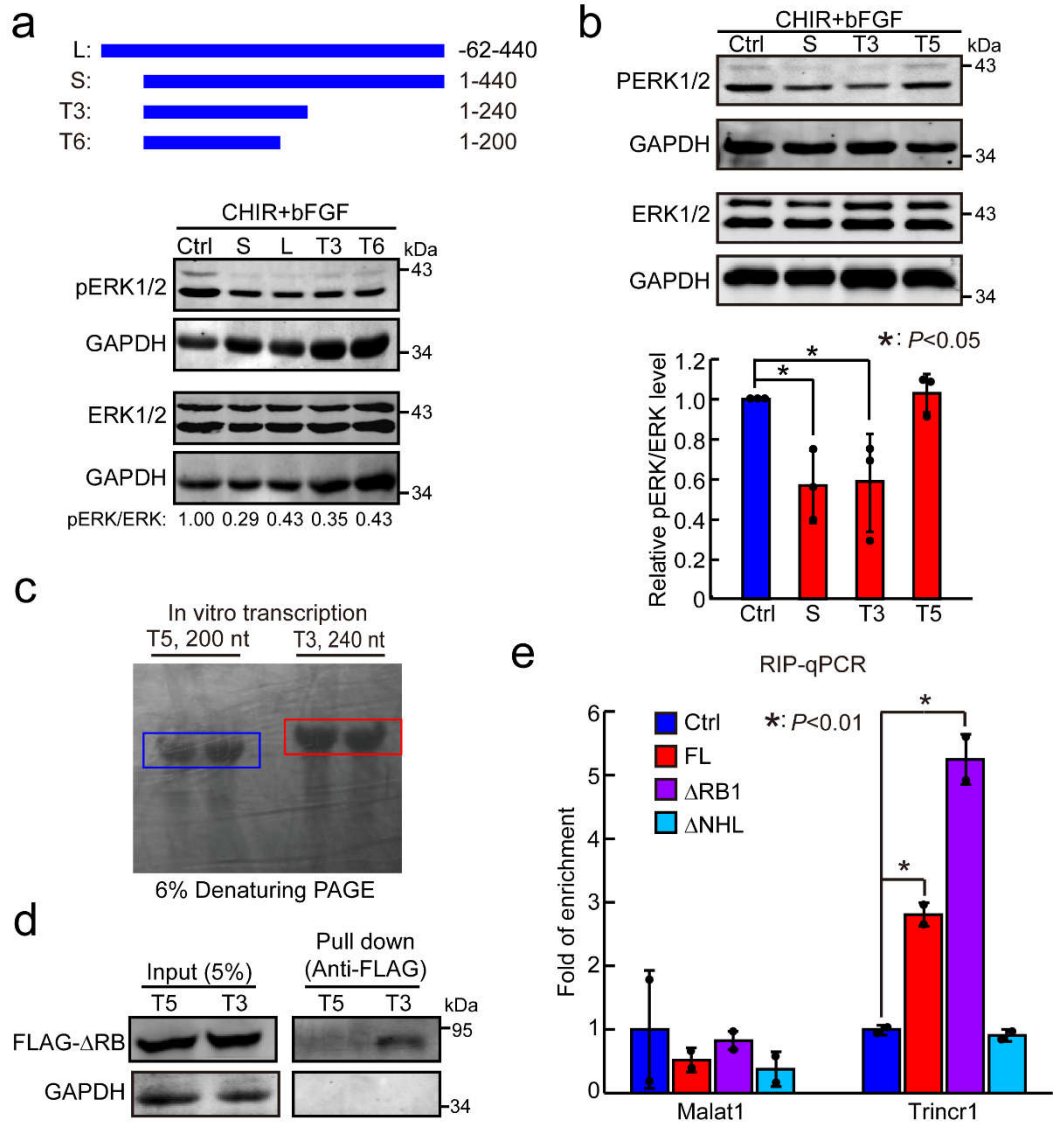

**Supplementary Figure 5.** Trincr1 physically interacts with TRIM71. **(a)** Western blotting analysis of phosphorylated ERK in ESCs overexpressing Trincr1\_S, Trincr1\_L and two truncated constructs of Trincr1 induced by bFGF. **(b)** Western blotting analysis of phosphorylated ERK in control and Trincr1\_S or truncated T3 or T5 overexpressing ESCs induced by bFGF. For quantification of pERK/ERK, data were normalized to GAPDH and then to control overexpression vector transfected ESCs cultured in CHIR and induced by 12 ng per ml bFGF. n = 3 independent experiments. **(c)** Urea denaturing PAGE purification of in vitro transcribed T3 and T5. The RNA products were then used to pull down protein factors for mass spectrometry analysis or western blotting analysis. **(d)** Western blotting analysis of Flag tagged, RING and B1 domain truncated TRIM71 pulled down by T3 and T5. Shown is a representative gel of two independent experiments. **(e)** RT-qPCR analysis of Trincr1 and Malat1 following Flag RIP in control, Flag-Trim71, Flag-RING and B1 truncated Trim71, and Flag-NHL domain truncated Trim71 overexpressing ESCs. Data were normalized to control 3X FLAG overexpression vector transfected ESCs. n = 2 biological replicates. Shown are mean  $\pm$  SD for (b) and (e). For (b) and (e), *P* values were determined by unpaired one-way and two-way ANOVA with two-sided Dunnett's test, respectively.

Supplementary Figure 6

**a**

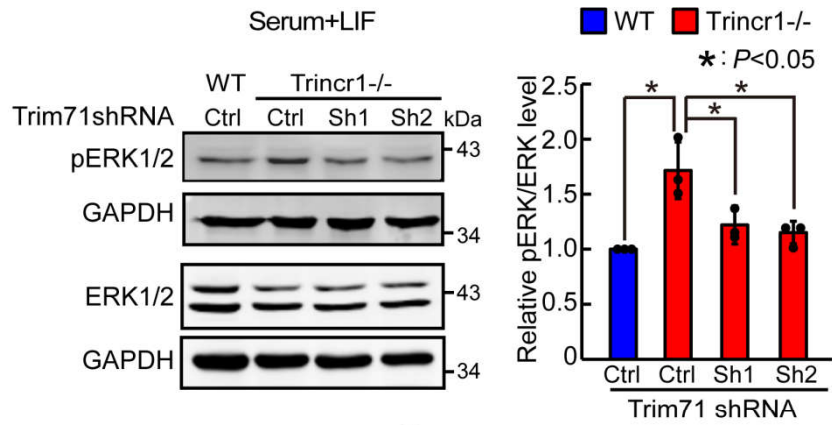

**b**

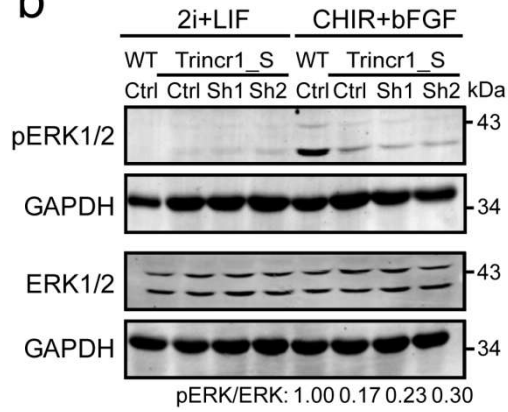

**c**

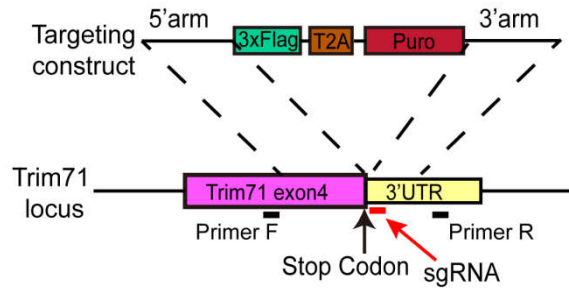

**Supplementary Figure 6.** *Trincr1* represses FGF/ERK signaling through Trim71. **(a)** Western blotting analysis of pERK in serum+LIF cultured wild type ESCs transfected with control shRNA vectors and *Trincr1*<sup>-/-</sup> ESCs transfected with control and Trim71 shRNA vectors. Sh1 and Sh2 are two different sets of shRNA constructs. Shown are representative gel images. Quantification of pERK/ERK were normalized to wild type ESCs transfected with control shRNA vectors. n = 3 independent experiments.

**(b)** Western blotting analysis of pERK in control or Trim71 shRNA ESCs in *Trincr1*<sub>S</sub> overexpression background. For quantification of pERK/ERK, data were normalized to GAPDH and then to empty control ESCs cultured in CHIR and induced by 12 ng per ml bFGF. **(c)** Graphic illustration showing 3X FLAG-knockin strategy to detect endogenous TRIM71 protein. The red arrow indicates the location of the gRNA, the black arrow indicates the location of TIRM71 stop codon. Primers for genomic PCR characterizing knock in allele are shown. For (a), shown are mean  $\pm$  SD. *P* values were determined by unpaired one-way ANOVA with two-sided Dunnett's test.

## Supplementary Figure 7

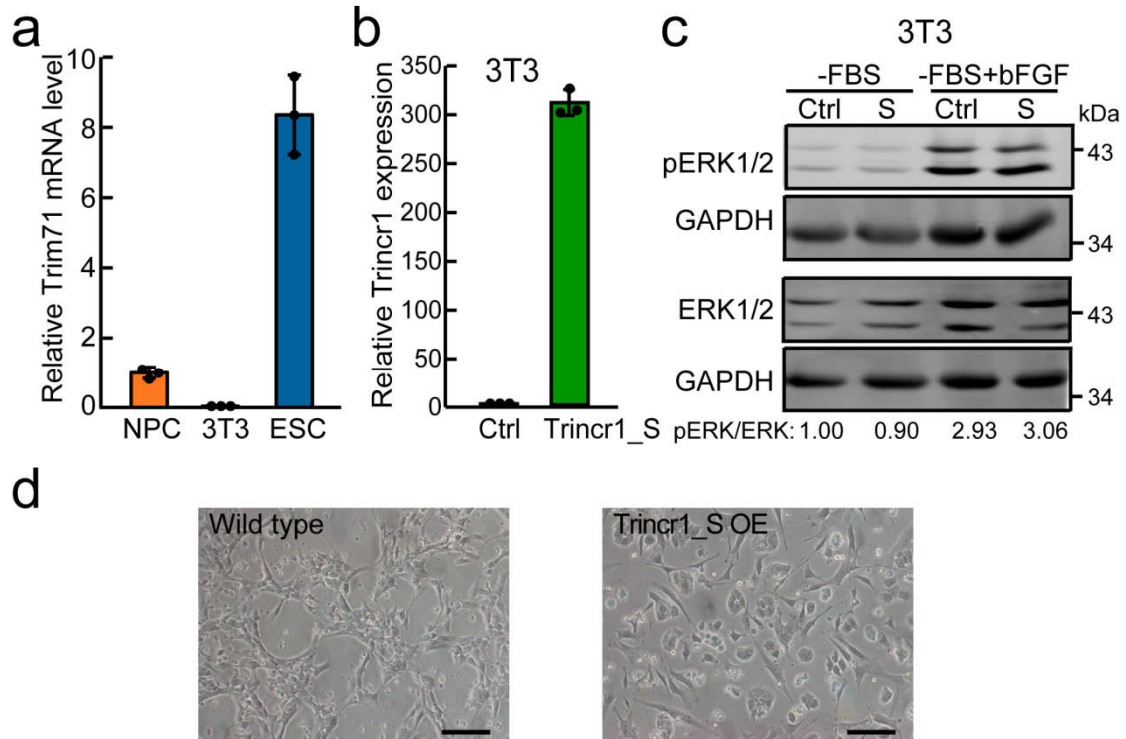

**Supplementary Figure 7.** Ectopic expression of Trincr1 represses FGF/ERK signaling in NPCs. (a) RT-qPCR analysis of Trim71 in NPCs, 3T3 and ESCs. The  $\beta$ -actin gene was used as a control. Data were normalized to NPCs.  $n = 3$  biological replicates. (b) RT-qPCR analysis of Trincr1 in empty control or Trincr1 overexpression 3T3 cells. The  $\beta$ -actin gene was used as a control. Data were normalized to control overexpression vector treated 3T3 cells.  $n = 3$  biological replicates. (c) Western blotting analysis of pERK in 3T3 cells overexpressing Trincr1\_S. For quantification of pERK/ERK, data were normalized to GAPDH and then to empty vector transfected 3T3 cells cultured in serum free media. (d) Morphology of wild type and Trincr1\_S overexpressing NPCs. Scale bars, 100  $\mu$ m. Shown are mean  $\pm$  SD for (a) and (b).

**Supplementary Figure 8.** Uncropped western blot images for the main figures

**Fig. 2e**

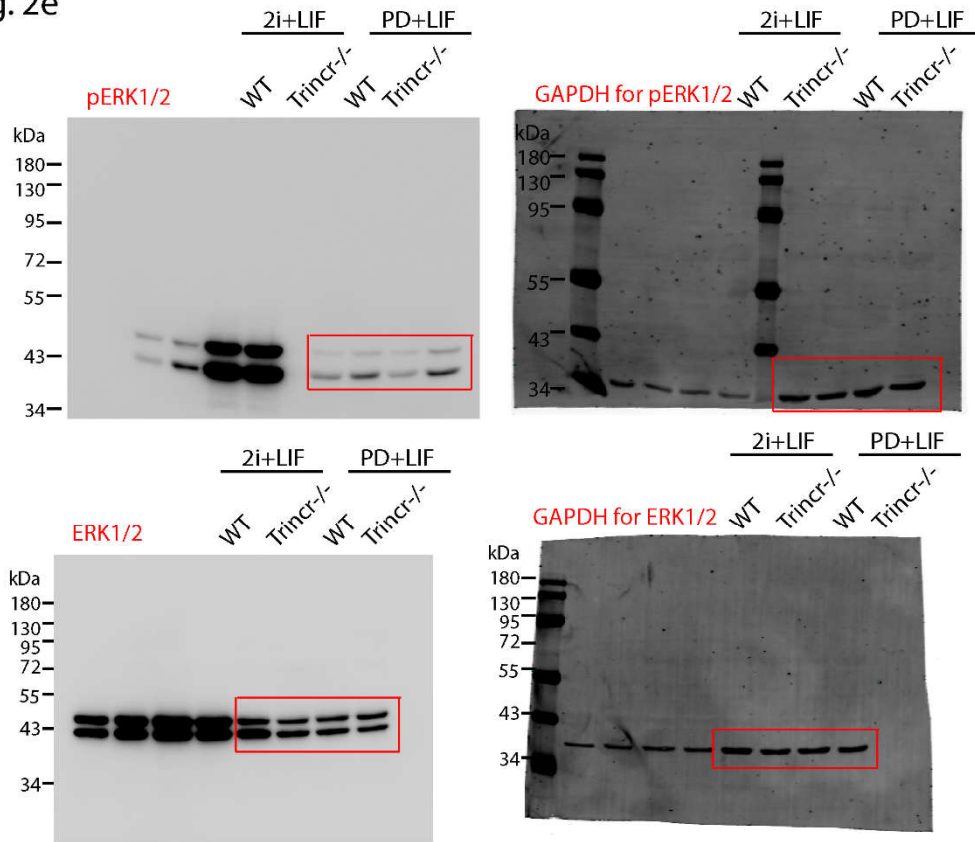

**Fig. 2f**

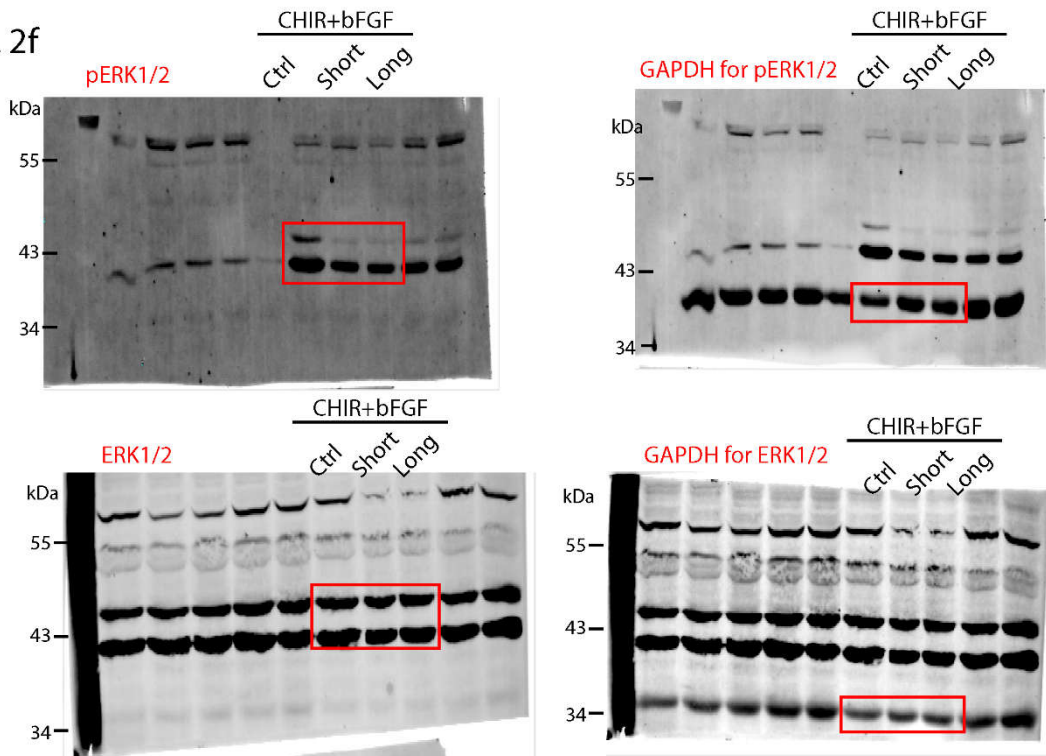



Fig. 4d

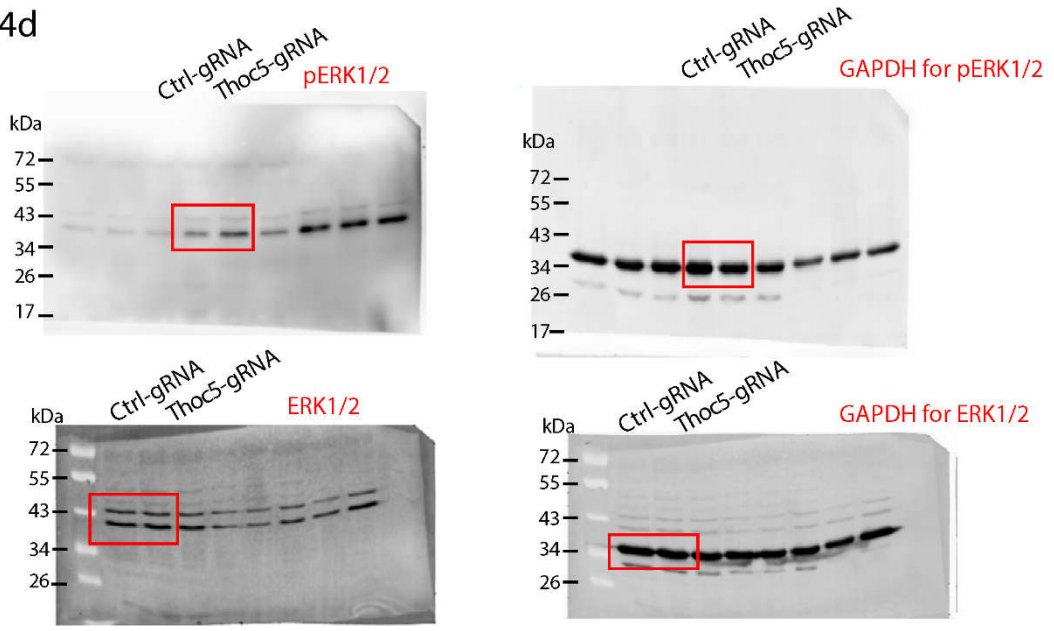

Fig. 5b

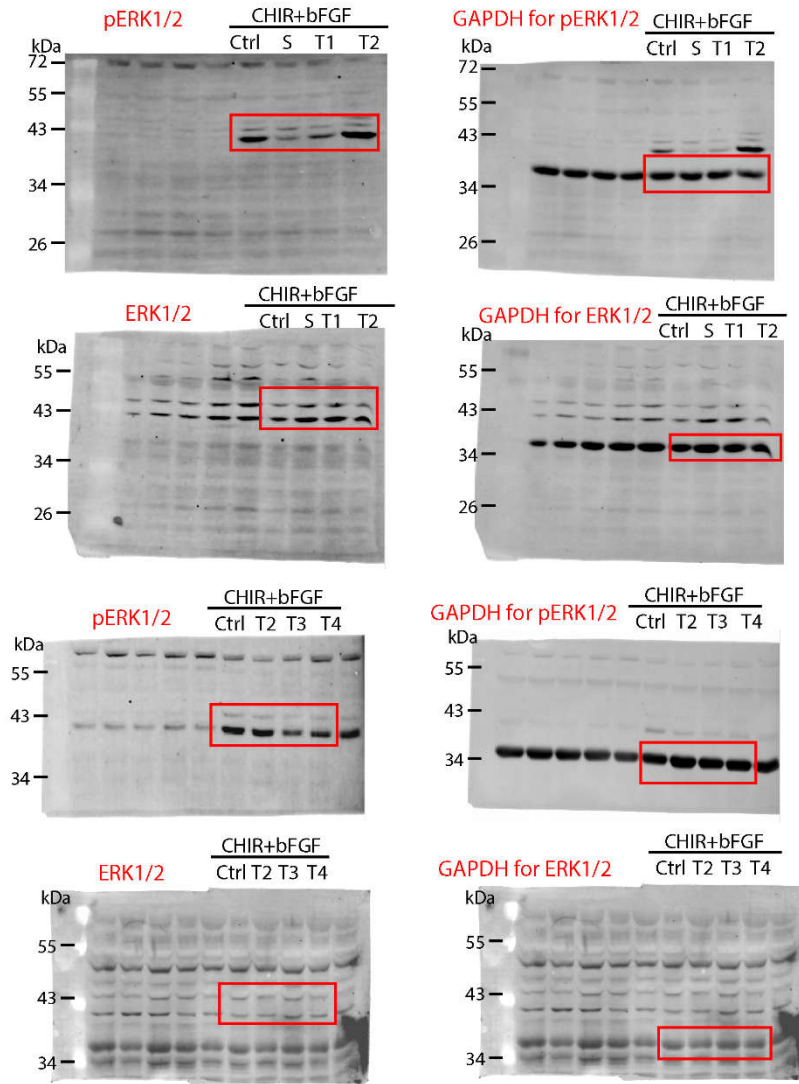

Fig. 5e

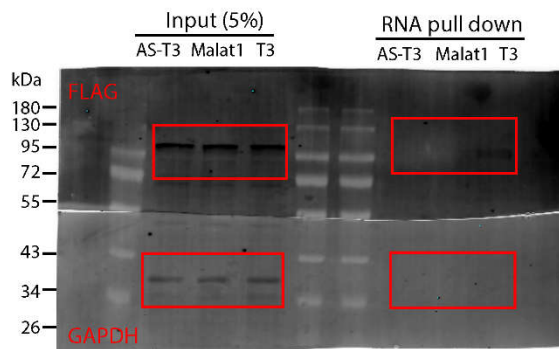

Fig. 5g

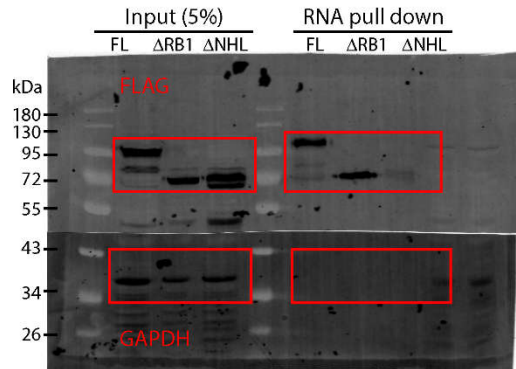

Fig. 6b

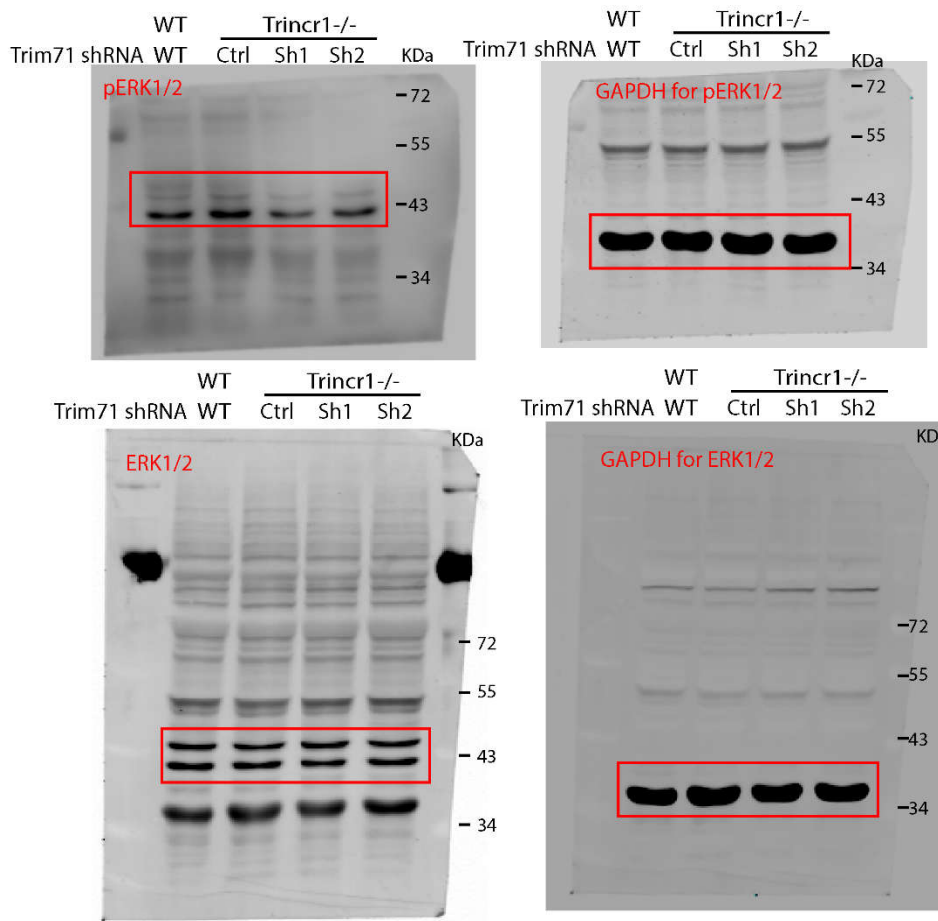

Fig. 6f

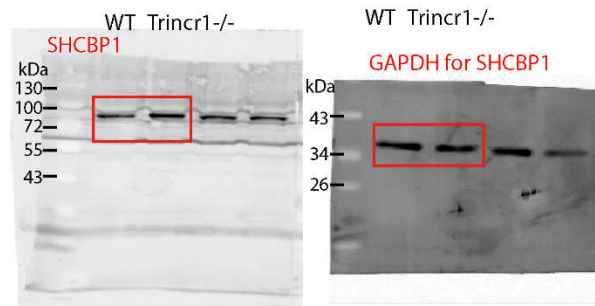

Fig. 6h

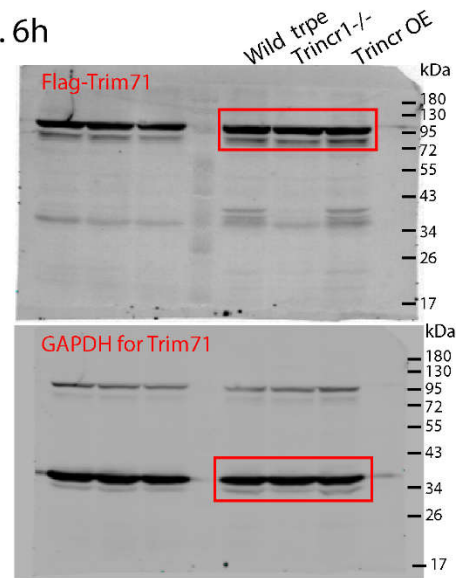

Fig. 6i

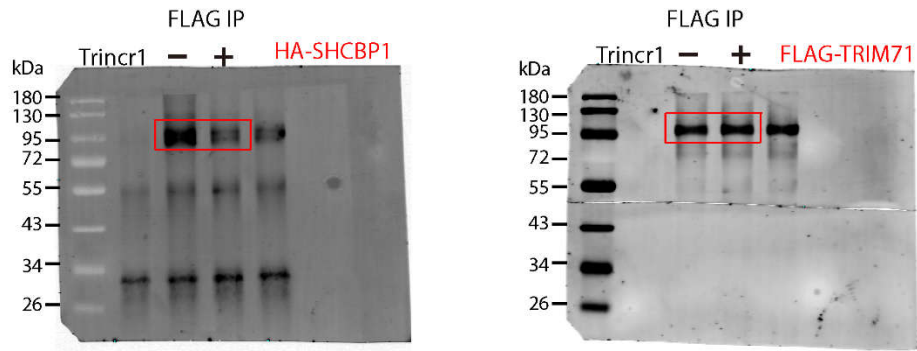

Fig. 7a

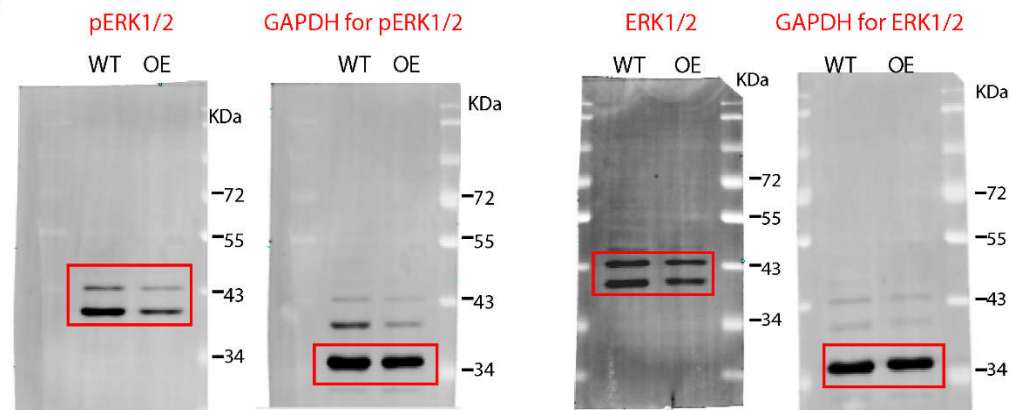

**Supplementary Table 1** Sequence of RT-qPCR primers

| <b>Gene</b>  | <b>Primer</b> | <b>Sequence (5'-3')</b>   |
|--------------|---------------|---------------------------|
| Actb         | S1F           | CCACCATGTACCCAGGCATT      |
|              | S1R           | CCGATCCACACAGAGTACTT      |
| Gapdh        | S1F           | CAAGGTCATCCATGACAACT      |
|              | S1R           | GTCTTCTGGGTGGCAGTGAT      |
| Oct4         | S1F           | CACCTGGGCGTTCTCTTT        |
|              | S1R           | ATGTTCTTAAGGCTGAGCTGCAA   |
| Sox2         | S1F           | GCAAGTACTGGCAAGACCGTT     |
|              | S1R           | CGATATCAACCTGCATGGACAT    |
| Nanog        | S1F           | GCTCAGCACCAGTGGAGTATCC    |
|              | S1R           | TCCAGATGCGTTCACCAGATAG    |
| Rex1         | S1F           | ATCGCTGTGGGCATTAGAGA      |
|              | S1R           | CGATCCTGCTTTCTTCTGTGT     |
| Klf2         | S1F           | GGTCCCCTTGCAAACAGACT      |
|              | S1R           | CAGAACTGGTGGCAGAGTCA      |
| Esrrb        | S1F           | TACCTGAACCTGCCGATTTTC     |
|              | S1R           | CCCAGTTGATGAGGAACACA      |
| Tbx3         | S1F           | TCCGGGCTCCACTTGAAAT       |
|              | S1R           | CCCCTACTCACACAACAATCTCAAC |
| Trim71       | S1F           | GGCCAATGGCAGCTTCCT        |
|              | S1R           | CCACCACGACGATCAATCC       |
| Trincrl      | S1F           | CGAGCCTTCTACTTGGCCAA      |
|              | S1R           | CTTCAGGACATGCTTGGTAACT    |
| Trincrl long | S1F           | GGAGTCAGACGAGGGAGCGC      |
|              | S1R           | GCAGCTGTGTTGGCCAAGTAG     |
| Fgf5         | S1F           | TGAACCCCTGCCACTTACTGAAA   |
|              | S1R           | TCATCACATTCCCGAATTAAGCT   |
| U1           | S1F           | CTGGCAGGGGAGATAACCATG     |
|              | S1R           | AGTCGAGTTTCCCGCATTTG      |
| Malat1       | S1F           | GGTCTCCCACAAGTGATTTCT     |
|              | S1R           | GGGTGAAGGGTCTGTGATTAGG    |
| Shcbp1       | S1F           | CTTTTGTGGATTGCACGGGT      |
|              | S1R           | TTCCAGTGTGGTCTTGCCAT      |

|               |     |                            |
|---------------|-----|----------------------------|
| Thoc5         | S1F | GGCCTGTGATAAGACGCTGT       |
|               | S1R | CCTTGCCTTGTTCATCCAAC       |
| Thoc2         | S1F | CTCCACAGTAAAGGACAGTCTCA    |
|               | S1R | TGGACAGTGGTGGAGGGTTA       |
| Nxf1          | S1F | GTCCAGCTATATCAGCGCCA       |
|               | S1R | GGGGCTTCGACATCAAAGGA       |
| Aly           | S1F | AGAGGCGGCATGACAAGAAA       |
|               | S1R | AGCTGCTGCTTTGAGTTCCT       |
| Nestin        | S1F | GACTCTGGAATGCAAGGGCT       |
|               | S1R | GCTGCCTGTAGACCCCTCATC      |
| Pax6          | S1F | CACATGAACAGTCAGCCCAT       |
|               | S1R | CTTGGACGGGAAGTACTGACT      |
| Clu           | S1F | GCTGTTTGACTCTGACCCCA       |
|               | S1R | TCTATCTCATTCGCGACGGC       |
| Gfap          | S1F | CAAGCACGAAGCTAACGACT       |
|               | S1R | CGCTCTTCTGTTTCGCGCAT       |
| Aqp4          | S1F | ACATGGAGGTGGAGGACAAC       |
|               | S1R | TTCTCCACGGTCAATGTCAA       |
| Cdk8          | S1F | GTGCTAGGGCGAGCATTTG        |
|               | S1R | GTCAGATCACGCTGTTACTCAA     |
| 5430416N02Rik | S1F | TCTGGCATCATGTCTACGCC       |
|               | S1R | AGCTCGGTTTCCACCTCTCT       |
| Mettl3        | S1F | CCAGATGAAATATATGGCATGATTGA |
|               | S1R | CACATTGTGTGGTTCGTCCAAA     |
| Atp5k         | S1F | CTCATCAAGTTCGGCCGGTA       |
|               | S1R | TCCTCCGCTGCTATTCTCCT       |
| H2afz         | S1F | ATCTAGGACAACCAGCCACG       |
|               | S1R | GACGAGGGGTGATACGCTTT       |
| Gm17586       | S1F | GACCGAGGTCTATGGGAGGT       |
|               | S1R | GTGGTGACGCTCATCTGTGA       |
| Vim           | S1F | CCAGATGAAATATATGGCATGATTGA |
|               | S1R | CACATTGTGTGGTTCGTCCAAA     |
| Numb          | S1F | CAGATCACAGTGCCTTCAGC       |
|               | S1R | CCACTCAGTCCCTTGTAACACAGG   |

**Supplementary Table 2** Target sequence of siRNAs, shRNAs and CRISPR i  
sgRNAs

| <b>Gene</b> | <b>si/sh/sgRNA</b> | <b>Sequence (5'-3')</b> |
|-------------|--------------------|-------------------------|
| Trim71      | si1                | CAAGAAGAUGACCGCAUUA     |
|             | si2                | GGGCAAGAUCUCGUUUCA      |
| Trincrl     | sh1                | GGCAAAGCCACACCAUUAUAUC  |
|             | sh2                | AGAGGUCCAAAGCACGUAAAC   |
| Trim71      | sh1                | GUACUUACAUAGUGAGCUA     |
|             | sh2                | GGAUCAUAGUGGCCGACAA     |
| Trim71      | sgRNA1             | ATAACCCGCGTTCTGAGAGG    |
|             | sgRNA2             | CTCGGCGAATCGTTCGTAGG    |
| Shcbp1      | sgRNA1             | TGAAATGGCTGATGATTTGC    |
|             | sgRNA2             | AAGGACGCGATTACCTGGGT    |
| Thoc5       | sgRNA              | AAACGCTCCTGGGTGGCGGT    |
| Thoc2       | sgRNA              | TGCGGGAACCACCACAGCCG    |
| Nxf1        | sgRNA              | CACCGCTACCTACGGACGTA    |
| Aly         | sgRNA              | GCCGCCTCGATTACCCGCG     |
