# Supplementary material for: A TRIM71 binding long noncoding RNA Trincr1 represses FGF/ERK signaling in embryonic stem cells
Source: PubMed Central journal article supplement (PMC6433952; doi:10.1038/s41467-019-08911-w), 2019-03-25
Supplement: 41467_2019_8911_MOESM3_ESM.pdf [file 41467_2019_8911_MOESM3_ESM.pdf]

## **Description of Additional Supplementary Files**

### **Supplementary Data 1**

Trim71 RIP sequencing data and list of Trim71 binding RNA.

### **Supplementary Data 2**

Gene expression in wild type and *Trincr1*<sup>-/-</sup> ESCs in 2i+LIF and PD+LIF.
